# Supplementary material for: Decoupling electrical conductivity and Seebeck coefficient via isoelectronic alloying in the 9-4-9-type Ca 9− y Eu y Zn 4.7 Sb 9 (0 ≤ y ≤ 5.0) Zintl phase
Source: Royal Society of Chemistry journal article supplement (doi:10.1039/d5ta04387e), 2025-12-01
Supplement: d5ta04387e1.pdf [file d5ta04387e1.pdf]

**Decoupling Electrical Conductivity and Seebeck Coefficient via Isoelectronic  
Alloying in 9-4-9-type  $\text{Ca}_{9-y}\text{Eu}_y\text{Zn}_{4.7}\text{Sb}_9$  ( $0 \leq y \leq 5.0$ ) Zintl Phase**

Wenhua Xue,<sup>a,b</sup> Chen Chen,<sup>c</sup> Pengfei Nan,<sup>d</sup> Youwen Long,<sup>a</sup> Binghui Ge,<sup>\*d</sup> Qian Zhang<sup>\*b</sup> and Yumei Wang<sup>\*ae</sup>

<sup>a</sup> Institute of Physics, Chinese Academy of Sciences, Beijing 100190, China

<sup>b</sup> School of Materials Science and Engineering, Harbin Institute of Technology, Shenzhen 518055, China

<sup>c</sup> School of Physical Sciences, Great Bay University, Dongguan, 523000, China

<sup>d</sup> Institutes of Physical Science and Information Technology, Anhui University, Hefei 230601, China

<sup>e</sup> Beijing Branch of Songshan Lake Materials Laboratory, Beijing 100190, China

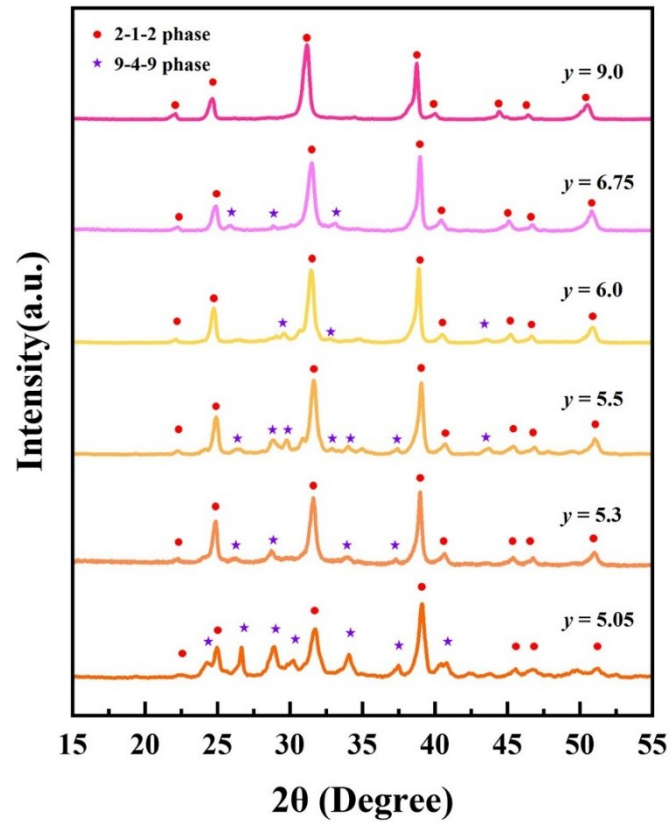

Fig. S1. The XRD patterns for the  $\text{Ca}_{9-y}\text{Eu}_y\text{Zn}_{4.7}\text{Sb}_9$  ( $y = 5.05, 5.3, 5.5, 6.0, 6.75$ ) and  $\text{Ca}_{9-y}\text{Eu}_y\text{Zn}_{4.41}\text{Sb}_9$  ( $y = 9.0$ ) samples.

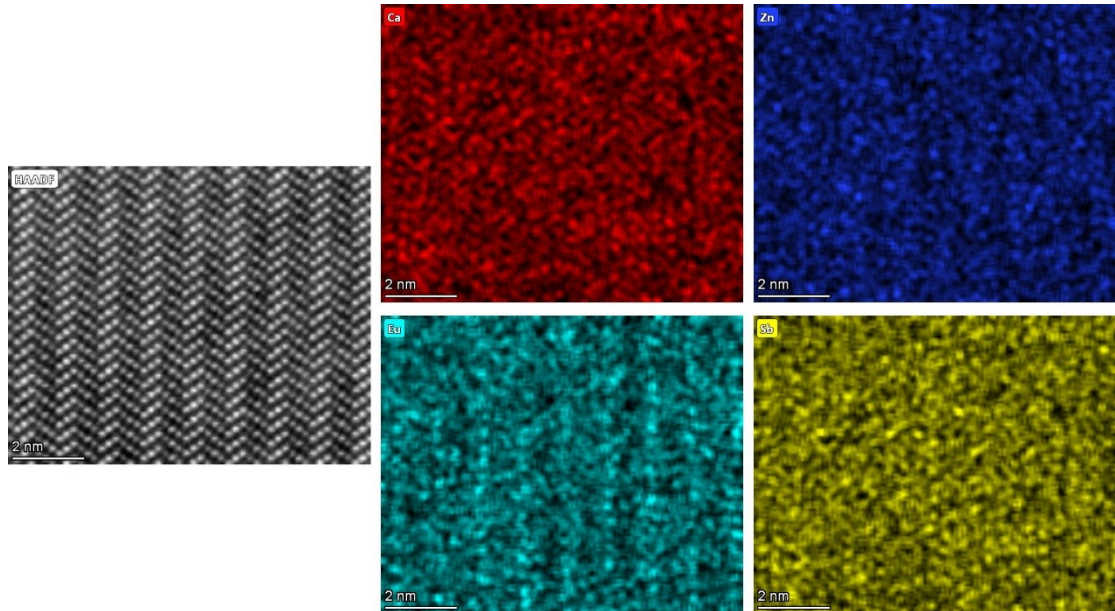

Fig. S2. The EDS mapping of the "intergrowth" structure in  $\text{Ca}_{9-y}\text{Eu}_y\text{Zn}_{4.7}\text{Sb}_9$  ( $y = 5.05$ ).

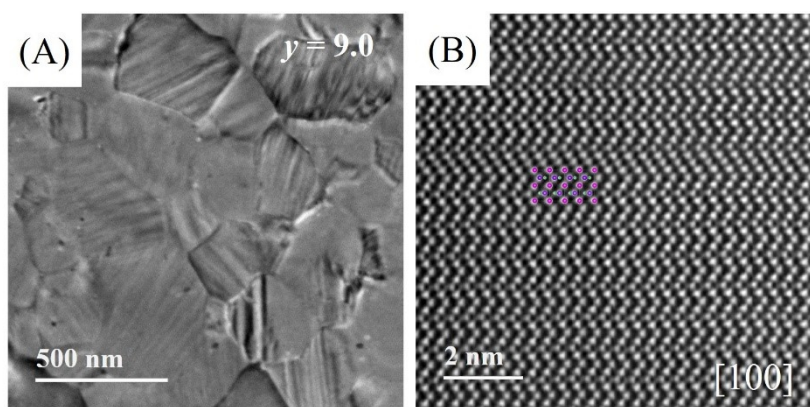

Fig. S3. (a) Low-magnification TEM image and (b) corresponding HAADF-STEM image for  $\text{Ca}_{9-y}\text{Eu}_y\text{Zn}_{4.41}\text{Sb}_9$  ( $y = 9.0$ ).
